1 ***Myotis rufoniger* Genome Sequence and Analyses: *M.***  
2 ***rufoniger*'s Genomic Feature and the Decreasing Effective**  
3 **Population Size of *Myotis* Bats**

4 Youngjune Bhak<sup>1,2</sup>, Yeonsu Jeon<sup>1,2</sup>, Sungwon Jeon<sup>1,2</sup>, Oksung Chung<sup>3,4</sup>, Sungwoong Jho<sup>3</sup>,  
5 JeHoon Jun<sup>3,4</sup>, Hak-Min Kim<sup>1,2</sup>, Yongsoo Cho<sup>1,2</sup>, Changan Yoon<sup>1,5</sup>, Seungwoo Lee<sup>6</sup>, Jung-  
6 Hoon Kang<sup>7</sup>, Jong-Deock Lim<sup>7</sup>, Junghwa An<sup>8</sup>, Yun Sung Cho<sup>1,2,3\*</sup>, Doug-Young Ryu<sup>6\*</sup>, and  
7 Jong Bhak<sup>1,2,3,4\*</sup>

8

9 <sup>1</sup>The Genomics Institute, Ulsan National Institute of Science and Technology (UNIST), Ulsan  
10 44919, Republic of Korea.

11 <sup>2</sup>Department of Biomedical Engineering, School of Life Sciences, Ulsan National Institute of  
12 Science and Technology (UNIST), Ulsan 44919, Republic of Korea.

13 <sup>3</sup>Personal Genomics Institute, Genome Research Foundation, Cheongju 28160, Republic of  
14 Korea.

15 <sup>4</sup>Genomics, Ulsan 44919, Republic of Korea. <sup>5</sup>Department of Biomedical Science, School of  
16 Nano-Bioscience & chemical Engineering, Ulsan National Institute of Science and  
17 Technology (UNIST), Ulsan 44919, Republic of Korea.

18 <sup>6</sup>BK21 PLUS Program for Creative Veterinary Science Research, Research Institute for  
19 Veterinary Science, and College of Veterinary Medicine, Seoul National University, Seoul  
20 08826, Republic of Korea.

21 <sup>7</sup>National Research Institute of Cultural Heritage, Cultural Heritage Administration, Daejeon  
22 34122, Republic of Korea.

23 <sup>8</sup>Animal Resources Division, National Institute of Biological Resources, Incheon 22689,  
24 Republic of Korea.

25 \* Corresponding authors

26 E-mail: joys0406@gmail.com (YSC)

27 dyryu@snu.ac.kr (DYR)

28 jongbhak@genomics.org (JB)

## 1 **Abstract**

2 *Myotis rufoniger* is a vesper bat in the genus *Myotis*. Here we report the whole genome  
3 sequence and analyses of the *M. rufoniger*. We generated 124 Gb of short-read DNA  
4 sequences with an estimated genome size of 1.88 Gb at a sequencing depth of 66× fold. The  
5 sequences were aligned to *M. brandtii* bat reference genome at a mapping rate of 96.50%  
6 covering 95.71% coding sequence region at 10× coverage. The divergence time of *Myotis* bat  
7 family is estimated to be 11.5 million years, and the divergence time between *M. rufoniger*  
8 and its closest species *M. davidii* is estimated to be 10.4 million years. We found 1,239  
9 function-altering *M. rufoniger* specific amino acid sequences from 929 genes compared to  
10 other *Myotis* bat and mammalian genomes. The functional enrichment test of the 929 genes  
11 detected amino acid changes in melanin associated *DCT*, *SLC45A2*, *TYRP1*, and *OCA2* genes  
12 possibly responsible for the *M. rufoniger*'s red fur color and a general coloration in *Myotis*.  
13 *N6AMT1* gene, associated with arsenic resistance, showed a high degree of function alteration  
14 in *M. rufoniger*. We further confirmed that *M. rufoniger* also has bat-specific sequences  
15 within *FSHB*, *GHR*, *IGF1R*, *TP53*, *MDM2*, *SLC45A2*, *RGS7BP*, *RHO*, *OPN1SW*, and  
16 *CNGB3* genes that have already been published to be related to bat's reproduction, lifespan,  
17 flight, low vision, and echolocation. Additionally, our demographic history analysis found  
18 that the effective population size of *Myotis* clade has been consistently decreasing since ~30k  
19 years ago. *M. rufoniger*'s effective population size was the lowest in *Myotis* bats, confirming  
20 its relatively low genetic diversity.

21

# 1 Introduction

2 *M. rufoniger* is a species of vesper bat in the family Vespertilionidae [1]. It can be  
3 distinguished from other bats by its rusty orange fur (S1 Picture) and is therefore called  
4 ‘golden bat’ or ‘red bat’ in South Korea (Republic of Korea). Recently, its scientific name  
5 has been re-assigned to *M. rufoniger* from *Myotis formosus tsuensis* based on a molecular  
6 phylogeny and morphological study of bats [2]. Although its population is not assessed  
7 systematically, it is apparently a rare species that has only been collected in a handful of  
8 localities [2]. In South Korea, *M. rufoniger* is protected and designated as a natural  
9 monument. Being one of the most well-known and iconic protected wild animals in South  
10 Korea, even an *M. rufoniger* exhibition center is also in operation (golden bat exhibition  
11 center in Hampyeong County, South Korea).

12 In 2012, a fruit bat *Pteropus alecto* and an insectivorous *Myotis davidii* genomes were  
13 published, reporting bat-specific amino acid sequences on *TP53* (Tumor Protein P53) and  
14 *MDM2* (MDM2 Proto-Oncogene) genes that are associated with DNA damage checkpoint  
15 and DNA repair pathways. They provided insights into bats’ evolution of high metabolic rate  
16 and an increased amount of free radicals that are associated with flight [3]. In 2013, the  
17 Brandt’s bat (*Myotis brandtii*) genome analysis further identified unique amino acid sequence  
18 changes in *GHR* (Growth Hormone Receptor), *IGF1R* (Insulin Like Growth Factor 1  
19 Receptor), *FSHB* (Follicle Stimulating Hormone Beta Subunit), *SLC45A2* (Solute carrier  
20 family 45, member 2), *RGS7BP* (Regulator of G-protein signaling 7 binding protein), *RHO*  
21 (Rhodopsin), *OPN1SW* (Opsin 1 [Cone Pigments], Short-Wave-Sensitive), and *CNGB3*  
22 (cyclic nucleotide gated channel beta 3) genes, providing new insights into bats’ delayed  
23 ovulation during hibernation, long lifespan, small body size, low vision, and echolocation [4].

1 As such, a set of close but distinct species genomes enable prediction of variants that may  
2 contain significant geno-phenotype association information [5-8]. This close species  
3 comparative genomics approach has been applied to *M. rufoniger* genome analyses to  
4 identify the species-specific variants that can confer functional and hence evolutionary  
5 adaptation of the *M. rufoniger*. To confirm and further identify such species-specific or bat-  
6 specific sequence changes, it is critical to evaluate such amino acid changes with as many  
7 genomes as possible at different levels of background comparison species. Thus, it is  
8 important to build biological resource with continuous sequencing of various species  
9 genomes.

10 A complete mitochondrial genome of *M. rufoniger* has been published already [9], while no  
11 whole-genome sequence has been reported yet, thus limiting the investigation of autosomal  
12 genetic signatures for environmental adaptations of *M. rufoniger*. Furthermore, the  
13 demographic history of a species can only be reconstructed accurately from deeply sequenced  
14 whole genomes [10,11]. Here, we provide a whole genome analysis of *M. rufoniger* by  
15 producing massively parallel short DNA sequences (approximately 124 Gb) with its genomic  
16 features and unique amino acid sequences, accompanied by its demographic history and  
17 genetic diversity.

18

## 19 **Results**

### 20 **Whole genome sequences of *M. rufoniger***

21 The genomic DNA from the wild carcass of *M. rufoniger* found in Gosudonggul cave,

1 Danyang, in South Korea, was sequenced using Illumina HiSeq2000 platform. A total of 124  
2 Gb of paired-end short DNA sequences were produced with a read length of 100 bp, and  
3 target insert sizes of 566 bp and 574 bp from two genomic libraries. After reducing low  
4 sequencing quality reads and possible microbial contaminated reads, we acquired a total of  
5 115 Gb of DNA sequences (Table 1; S1 Table). To confirm the species identification of the  
6 sample, a phylogenetic analysis was performed using a multiple sequence alignment of  
7 mitochondrial cytochrome b sequences, and our sample was verified to be the closest to *M.*  
8 *rufoniger* (S1 Figure). We performed a *K*-mer analysis ( $K=17$ ) using the *M. rufoniger*  
9 whole genome sequences, and its genome size was predicted to be approximately 1.88 Gb  
10 (S2 Figure; S2 Table). This is similar to those of other bat species and smaller than those of  
11 other mammals [3,4,12]. Since there is no *de novo* assembled *M. rufoniger* genome, the DNA  
12 reads were aligned to all three available *Myotis* bat reference genomes (*M. brandtii*, *M.*  
13 *dauidii*, and *M. lucifugus*; Table 1; S3 Table). The consensus DNA sequences of *M. rufoniger*  
14 were generated by substituting *M. rufoniger* single nucleotide variants (SNVs) detected from  
15 the whole genome sequencing data against the three reference genomes. The genome  
16 coverage ( $\geq 10\times$ , 87.63 %) was the highest when the *M. lucifugus* assembly was the reference,  
17 while the coding sequence (CDS) coverage ( $\geq 10\times$ , 96.60 %) was the highest when the *M.*  
18 *dauidii* genome was the reference. The number of SNVs (58,660,193) was the lowest when  
19 the *M. brandtii* was the reference, while the number of small insertions and deletions was the  
20 lowest when the *M. dauidii* was the reference. However, when the *M. brandtii* assembly was  
21 the reference, the mapping rate (96.50 %) and the number of consensus genes (17,247) was  
22 the highest. Therefore, we used *M. brandtii* reference-guided *M. rufoniger* consensus  
23 sequences for following analyses.

1

2 **Table 1. Sequencing and mapping statistics of *M. rufoniger* genome**

|                                           | Myotis bat references |                   |                     |
|-------------------------------------------|-----------------------|-------------------|---------------------|
|                                           | <i>M. brandtii</i>    | <i>M. davidii</i> | <i>M. lucifugus</i> |
| Sequenced reads                           | 1,240,507,648         |                   |                     |
| Low quality filtered reads                | 1,152,154,630         |                   |                     |
| Contamination filtered reads              | 1,149,260,980         |                   |                     |
| Mapped reads                              | 1,109,045,915         | 1,101,733,443     | 1,095,435,354       |
| Mapping rate                              | 96.50%                | 95.86%            | 95.32%              |
| Deduplicated reads                        | 1,023,540,144         | 1,017,982,320     | 1,010,388,456       |
| Depth coverage                            | 49.5 ×                | 51.5 ×            | 49.1 ×              |
| 1× genome coverage                        | 90.17%                | 87.65%            | 92.29%              |
| 5× genome coverage                        | 87.83%                | 85.68%            | 89.88%              |
| 8× genome coverage                        | 86.47%                | 84.60%            | 88.52%              |
| 10× genome coverage                       | 85.58%                | 83.88%            | 87.63%              |
| 1× CDS coverage                           | 98.86%                | 99.10%            | 98.13%              |
| 5× CDS coverage                           | 97.68%                | 98.19%            | 96.29%              |
| 8× CDS coverage                           | 96.60%                | 97.33%            | 94.88%              |
| 10× CDS coverage                          | 95.71%                | 96.60%            | 93.81%              |
| The number of homozygous SNVs             | 50,615,560            | 56,635,858        | 50,441,069          |
| The number of heterozygous SNVs           | 8,044,633             | 8,008,552         | 8,306,592           |
| The number of homozygous indels           | 4,197,521             | 4,231,431         | 4,313,780           |
| The number of heterozygous indels         | 517,253               | 457,868           | 512,018             |
| The number of consensus genes             | 17,274                | 16,419            | 17,141              |
| The number of consensus genes without gap | 12,841                | 12,618            | 12,941              |

3

4

5 We examined the base composition of *M. rufoniger* genome (S4 Table) and found that the

1 ratio of GC content was higher in the CDS region (52.15 ~ 52.95 %) than that of the whole  
2 genome (41.49 ~ 42.28 %), and this is concordant with the other mammalian species (the GC  
3 content ratios of the other species were 48.98 ~ 54.35 % in the CDS region and 37.82 ~  
4 42.93 % in the whole genome; S5 Table). The proportion of known transposon-derived  
5 repeats in the *M. rufoniger* genome was 19.05%, which is comparable with those of other  
6 bats (19.34 ~ 33.32 %), but significantly lower than those of other mammalian genomes  
7 (25.27 ~ 51.62 %; S6 Table).

8 The body of the *M. rufoniger* carcass used in this study was damaged and its morphological  
9 sex determination was not possible. We therefore compared its heterozygosity in X-  
10 chromosomal scaffolds with that of the other male *Myotis* bat (S7 Table). Since mammalian  
11 males have both X and Y sex chromosomes while females have two X chromosomes, a male  
12 individual has to show a lower heterozygosity in X chromosome than that of a female  
13 individual. Our sample showed an even lower heterozygosity in X-chromosomal scaffolds  
14 than that of the male *M. davidii* individual, indicating that it is clearly a male.

15

## 16 **Relationship of *M. rufoniger* to other mammalian species**

17 We identified orthologous gene clusters from 13 mammalian genomes (seven bat  
18 genomes: *Myotis brandtii*, *Myotis lucifugus*, *Myotis davidii*, *Eptesicus fuscus*, *Pteropus*  
19 *alecto*, *Pteropus vampyrus*, and *Rousettus aegyptiacus*, and six other mammalian  
20 genomes: *Homo sapiens*, *Mus musculus*, *Bos taurus*, *Equus caballus*, *Heterocephalus*  
21 *glaber*, and *Monodelphis domestica*; S2 Table) using OrthoMCL software [13]. The *M.*  
22 *rufoniger* genes were matched and added to the orthologous clusters of *M. brandtii*'s genes,

1 and 6,782 single-copy gene families among the 14 species were identified [7].  
2 The divergence times of *M. rufoniger* and the 13 mammals were estimated using 1,258,141  
3 four-fold degenerate sites from the 6,782 single-copy genes (Fig. 1). The closest clade to bats  
4 was *E. caballus* (horse) and *B. taurus* (cow) clade (diverged at 79.45 million years ago  
5 [MYA]). The *Myotis* bats diverged into its current clade approximately 11.52 MYA. *M.*  
6 *dauidii* was estimated to be the closest to the *M. rufoniger* among the three *Myotis* bats used  
7 in this study. The divergence time between *M. rufoniger* and *M. dauidii* was estimated to be  
8 10.41 million years, indicating a fairly recent divergence which is suitable for our close  
9 species comparative genomics analyses.

10

### 11 **Fig 1. Phylogenetic relationships and divergence times in bats and mammalian species.**

12 The estimated divergence time (million years ago; MYA) is given at the nodes, with the 95%  
13 confidence intervals in parentheses. The calibration times of *M. brandtii* - *H. sapiens* (97.5  
14 MYA), and *M. brandtii* - *P. alecto* (62.6 MYA) were derived from the TimeTree database.  
15 Colored branches and circles represent bat groups (*blue*: insect-eating microbat, *red*: fruits-  
16 eating mega bat). *M. domestica*, used as an outgroup species, was excluded in this figure.

17

### 18 ***M. rufoniger* specific amino acid sequences**

19 From previous studies [3,4], bat-specific amino acid sequences within *FSHB*, *GHR*, *IGF1R*,  
20 *TP53*, *MDM2*, *SLC45A2*, *RGS7BP*, *RHO*, *OPN1SW*, and *CNGB3* genes were reported. They  
21 represent some general characteristics of *Myotis* bats: delayed ovulation (*FHSB*), long  
22 lifespan (*GHR* and *IGF1R*), powered flight (*TP53* and *MDM2*), echolocation (*SLC45A2* and



1 *RGS7B*), and low vision (*RHO*, *OPN1SW*, and *CNGB3*). The same amino acid sequences  
2 within the above listed genes were also identified in the *M. rufoniger* genome (S3 Figure).

3 To further identify bat-specific amino acid sequences linked to environmental adaptations  
4 and unique evolutionary features, we investigated *M. rufoniger* specific amino acid changes  
5 compared to other *Myotis* bats. A total of 3,366 unique amino acid changes (uAACs) from  
6 2,125 genes were identified in *M. rufoniger*. Among them, 1,696 uAACs from 1,228 genes  
7 were predicted to be function altering by the protein variation effect analyzer (PROVEAN)  
8 software (variant score  $\leq -2.5$ ; S8 Table) [14]. These function-altering variants and associated  
9 genes can provide insights onto *M. rufoniger* specific evolutionary adaptation. When gap-  
10 containing genes were excluded, 1,239 uAACs from 929 genes were predicted to be function  
11 altering (S9 Table). A functional enrichment analysis of the 929 genes having function-  
12 altering uAACs was performed using DAVID (Database for Annotation Visualization and  
13 Integrated Discovery) tool [15]. The probably function-altered genes were significantly  
14 enriched in reproduction related terms (Gene Ontology [GO] analysis with a  $P$ -value  $\leq 0.05$   
15 by EASE scores [modified Fisher's exact test] and with a 10% of false discovery rate [FDR])  
16 including reproductive processes in a multicellular organism ( $P$ -value: 0.00026, 39 genes,  
17 GO: 0048609), ovulation cycle ( $P$ -value: 0.00052, 11 genes, GO: 0042698), and gamete  
18 generation ( $P$ -value: 0.0017, 31 genes, GO: 0007276; S10 Table). In *M. rufoniger*, pigment  
19 related terms were significantly enriched in the function-altered genes as in the melanin  
20 biosynthetic process ( $P$ -value: 0.0037, 4 genes, GO: 0042438; S10 Table). The genes are  
21 *DCT* (Dopachrome tautomerase), *SLC45A2* (Solute carrier family 45), *TYRP1* (Tyrosinase-  
22 related protein 1), and *OCA2* (Oculocutaneous albinism II). We could identify some uAACs  
23 in *DCT*, *SLC45A2*, *TYRP1*, and *OCA2* genes in the other *Myotis* bats as function-altering

1 using PROVEAN software (Table 2; S11 Table) [14] indicating those genes are not only  
 2 specific to *M. rufoniger*'s red fur color. The multiple sequence alignments and specific amino  
 3 acid sequences are presented in S4 Figure.

4 **Table 2. *Myotis* bats' uAACs within melanin associated genes**

| Gene           | Description                  | The number of uAACs<br>(The number of uAACs with PROVEAN score $\leq -2.5$ ) |                    |                   |                     |
|----------------|------------------------------|------------------------------------------------------------------------------|--------------------|-------------------|---------------------|
|                |                              | <i>M. rufoniger</i>                                                          | <i>M. brandtii</i> | <i>M. davidii</i> | <i>M. lucifugus</i> |
| <i>DCT</i>     | Dopachrome tautomerase       | 2 (2)                                                                        | 0 (0)              | 0 (0)             | 1 (0)               |
| <i>SLC45A2</i> | Solute carrier family 45     | 3 (1)                                                                        | 0 (0)              | 0 (0)             | 0 (0)               |
| <i>TYRP1</i>   | Tyrosinase-related protein 1 | 2 (1)                                                                        | 0 (0)              | 1 (1)             | 0 (0)               |
| <i>OCA2</i>    | Oculocutaneous albinism II   | 3 (3)                                                                        | 1 (0)              | 0 (0)             | 2 (2)               |

5

6 As we were interested in the variants' whole gene function, all the PROVEAN variant scores  
 7 of each gene were summed up. We then ranked the sums of the function-altered gene  
 8 candidates (S12 Table). For the top 20 genes, the same analysis was carried out in the other  
 9 *Myotis* bat species for comparison (Table 3; S13, S14 Table). We ranked *M. rufoniger*'s genes  
 10 according to the numbers of variants and summed variant scores, and compared them to those  
 11 of other *Myotis* bat genes. From the result, *N6AMT1* (N-6 Adenine-Specific DNA  
 12 Methyltransferase 1) showed the fourth-lowest sum of variants scores (sum of PROVEAN  
 13 variant scores: -40.285 and number of variants: six in *M. rufoniger*; no uAAC in the other  
 14 *Myotis* bats), indicating a high degree of function alteration of *N6AMT1* in *M. rufoniger*. The  
 15 multiple sequence alignments and specific amino acid sequences are presented in S5 Figure.

16

17 **Table 3. The summed PROVEAN variant score for top 20 ranked genes. The lower the**  
 18 **more significant.**

| Gene            | Description                                                | Sum of the PROVEAN variant scores |                          |
|-----------------|------------------------------------------------------------|-----------------------------------|--------------------------|
|                 |                                                            | <i>M. rufoniger</i>               | Other <i>Myotis</i> bats |
| <i>BCO1</i>     | Beta-Carotene Oxygenase 1                                  | -51.29                            | -8.13 ~ 0                |
| <i>CCDC184</i>  | Coiled-coil Domain Containing 184                          | -47.77                            | -2.88 ~ 0                |
| <i>PCMI</i>     | Pericentriolar material 1 protein                          | -40.61                            | -19.04 ~ 0               |
| <i>N6AMT1</i>   | N-6 adenine-specific DNA methyltransferase 1               | -40.29                            | 0 ~ 0                    |
| <i>MDN1</i>     | Midasin AAA ATPase 1                                       | -37.90                            | -32.07 ~ -5.80           |
| <i>CEP350</i>   | Centrosomal protein 350                                    | -37.30                            | -15.16 ~ -4.92           |
| <i>WNK2</i>     | WNK Lysine Deficient Protein Kinase 2                      | -34.67                            | -17.12 ~ -4.79           |
| <i>SPG11</i>    | Spastic Paraplegia 11                                      | -29.39                            | -18.19 ~ 0               |
| <i>C10orf12</i> | Uncharacterized protein                                    | -29.01                            | -18.97 ~ 0               |
| <i>C1orf228</i> | Uncharacterized protein                                    | -28.71                            | -8.22 ~ 0                |
| <i>NOC2L</i>    | NOC2 Like Nucleolar Associated Transcriptional Repressor   | -28.61                            | 0 ~ 0                    |
| <i>CPLX3</i>    | Complexin 3                                                | -27.85                            | -7.67 ~ 0                |
| <i>KIAA1462</i> | Junctional Protein Associated With Coronary Artery Disease | -27.73                            | -3.22 ~ 0                |
| <i>ALPK2</i>    | Alpha Kinase 2                                             | -26.00                            | -9.09 ~ 0                |
| <i>PTRH1</i>    | peptidyl-tRNA hydrolase 1                                  | -25.30                            | 0 ~ 0                    |
| <i>MYO16</i>    | Myosin XVI                                                 | -24.71                            | -14.57 ~ 0               |
| <i>KIAA0922</i> | Transmembrane protein 131-like                             | -24.59                            | -4.33 ~ 0                |
| <i>OAT</i>      | Ornithine aminotransferase                                 | -24.44                            | -11.60 ~ 0               |
| <i>SPAG17</i>   | sperm associated antigen 17                                | -23.71                            | -16.24 ~ -2.18           |
| <i>IPMK</i>     | Inositol Polyphosphate Multikinase                         | -23.47                            | 0 ~ 0                    |

1

## 2 **Demographic history and the genetic diversity of *Myotis* bats**

3 Deeply sequenced genomes allow the estimation of population structure history [10,11]. To  
4 investigate the demographic history of *Myotis* bats, a pairwise sequentially Markovian  
5 coalescent (PSMC) model inference analysis was conducted [11]. *M. rufoniger* was estimated  
6 as the most flourished species around 30 ~ 300 k years ago compared to the other *Myotis* bats,  
7 and its demographic history showed that its population peak was 50 k years ago (Fig. 2).  
8 However, its effective population size was dramatically decreased during the last glacial

1 period (10 ~ 50 k years ago), and it was estimated to be the lowest in present. Also, a  
2 consistent decline in the effective population size of *Myotis* bats since ~30 k years ago was  
3 found (Fig. 2). We further investigated the genomic diversity (which can be affected by  
4 population size) of the *M. rufoniger* and compared it to those of the other *Myotis* bats. The *M.*  
5 *rufoniger* genetic diversity (0.00391), based on the heterozygous SNV rate, was lower than  
6 those of the *M. davidii* (0.00471) and the *M. brandtii* (0.00614), confirming the *M.*  
7 *rufoniger*'s low effective population size (S13 Table).

8

9 **Fig 2. Demographic history of *Myotis* bats.**  $T_{\text{surf}}$ , atmospheric surface air temperature (T  
10 indicates temperature, surf indicates surface); RSL, relative sea level; 10 m.s.l.e., 10 m sea  
11 level equivalent; g, generation time (years);  $\mu$ , mutation rate per base pair per year.

12

## 13 Discussion

14 The function-altering variants containing genes of the *M. rufoniger* were concentrated in  
15 reproduction associated pathways. Prolonged sperm storage is a common behavior in  
16 Vespertilionidae (including genus *Myotis*, *Pipistrellus*, *Nyctalus*, *Eptesicus*, *Vesoertilio*,  
17 *Chalinolobus*, and *Plecotus*) and Rhinolophidae family species [16-18], and thus it is  
18 probably not *M. rufoniger* specific as reproduction related genes are always under strong  
19 natural selection. Therefore, such hits can be regarded as general or even a kind of artefact.  
20 Therefore, further detailed functional verification is necessary to understand the roles of each  
21 uAAC in functional categories such as reproduction.

22 The previous bat studies reported unique variants representing some general characteristics of

1 *Myotis* bats: delayed ovulation (*FHSB*), long lifespan (*GHR* and *IGF1R*), powered flight  
2 (*TP53* and *MDM2*), echolocation (*SLC45A2* and *RGS7B*), and low vision (*RHO*, *OPN1SW*,  
3 and *CNGB3*) [3, 4]. We confirmed the reported amino acid sequences within the above listed  
4 genes were conserved in the *M. rufoniger* as in other bat genomes (S3 Figure), supporting  
5 that those variants are *Myotis* bat-wide not one species-specific nor individual-specific  
6 variants.

7 We also found that the function-altering unique variants containing the genes of the *M.*  
8 *rufoniger* were concentrated in a melanin associated pathway including *DCT*, *SLC45A2*,  
9 *TYRP1*, and *OCA2* genes. *TYRP1* and *DCT* genes are known to influence the quantity and the  
10 quality of melanin [19]. Mutations on the *TYRP1* gene are known to be associated with  
11 “rufous/red albinism”, causing reddish-brown skin or red hair [20-22]. The protein  
12 (melanocyte-specific transporter protein) encoded by *OCA2* gene has been reported as a  
13 transporter of tyrosine, the precursor to melanin synthesis [23]. Variants within the *SLC45A2*  
14 gene have shown association with hair color, affecting red/yellow pheomelanin pathway [24-  
15 25]. In this context, we suggest that the variants within the *DCT*, *SLC45A2*, *TYRP1*, and  
16 *OCA2* genes are likely responsible for the *M. rufoniger*’s rusty orange fur color, which  
17 distinguish it from the other bats. However, fewer but certain uAACs within the *DCT*,  
18 *SLC45A2*, *TYRP1*, and *OCA2* genes were also found in the other *Myotis* bats, suggesting a  
19 possible general role of those genes in bat-wide coloration. Therefore, a set of bat species  
20 with color diversity will be required for further analyses to understand the precise geno-  
21 phenotype associations in coloration.

22 In the *M. rufoniger* genome, *N6AMT1* gene showed a high degree of function alteration. The  
23 protein (HemK methyltransferase family member 2) encoded by *N6AMT1* gene can transform

1 monomethylarsonous acid to dimethylarsinic acid, conferring resistance of mammalian cells  
2 to arsenic-induced toxicity [26]. An elemental analysis in the tissues from the *M. rufoniger*  
3 individual analyzed in the present study showed a very high concentration of arsenic in its  
4 intestinal tissue [27], suggesting that the *M. rufoniger* individual was exposed to food or  
5 water highly contaminated with arsenic. In this context, uAACs in *N6AMT1* can be  
6 considered as a possible chemical adaptation signature. It can be a generally stressful  
7 condition for the bats living in caves, because caves are hazardous due to various harmful  
8 elements and chemicals such as heavy metals [28]. However, until a further experimental  
9 validation is carried out, it is a very speculative hypothesis of rapid adaptation to harmful  
10 cave elements. Furthermore, this study used genomic data from only one individual for each  
11 species and the variant comparison analysis can be biased by individual-specific variants.  
12 More genomes are necessary to be sequenced to confirm that our finding's general  
13 applicability in both *M. rufoniger* and *Myotis* bats.

14 The *M. rufoniger* showed the lowest effective population size compared to other *Myotis* bats  
15 from the PSMC analysis. This does not necessarily indicate that they are the most endangered  
16 as they are fairly widely spread. It is perhaps more reasonable to attribute it to very recent  
17 human encroachment. It is also shown that the population size of the *M. rufoniger* was  
18 dramatically decreased during the latter part of the last glacial period. There was a consistent  
19 decline of *Myotis* bat family's effective population size since ~30 k years ago. However, we  
20 cannot determine whether it is a bat-wide or *Myotis* bat specific phenomenon either, because  
21 we conducted the PSMC analysis using a small number of species. The dramatic decrease in  
22 the population size of the *M. rufoniger* could be a Korean *M. rufoniger* specific phenomenon.  
23 Therefore, a set of diverse species will be required to accurately model the bats' effective

1 population size history.

2 In conclusion, we report the first whole genome sequences of the *M. rufoniger* with  
3 bioinformatics analyses such as multiple sequence alignment, function altering uAAC  
4 prediction, functional enrichment, and population size estimation using PSMC. These  
5 provided us with some speculative insights on how bats adapted to environment sustaining  
6 the current behavioral, physiological, and demographic features such as bat's prolonged  
7 sperm storage during reproduction, long lifespan, powered flight, low vision, echolocation,  
8 possible arsenic resistance, fur coloration, and consistently decreasing effective population  
9 sizes in their demographic history.

10

## 1 **Materials and Method**

2

### 3 **Sample and genome sequencing**

4 The partially decomposed carcass of *M. rufoniger* was found in August 2012 at Gosudonggul  
5 cave in Danyang, South Korea (coordinates: 36° 59' 18.67" N, 128° 22' 53.26" E; elevation:  
6 180.65 m) by Gosudonggul cave management office staff. The *M. rufoniger* was moved to  
7 the Natural Heritage Center of the Cultural Heritage Administration (South Korea) and kept  
8 frozen (Keeping temperature: -70°C). We acquired the *M. rufoniger* sample from the Natural  
9 Heritage Center under the Cultural Heritage Administration permit in June 2013. The wing  
10 membrane tissue, which seemed not decayed, was acquired for genomic DNA sequencing (S1  
11 Picture).

12 Its genomic DNA was sequenced using Illumina HiSeq2000 platform, with a read length of  
13 100 bp and insert sizes of 566 and 574 bp from two genomic libraries. The DNA was  
14 extracted using a Tiangen Micro DNA Kit. The amount of DNA was quantified by  
15 fluorometry using a UV spectrophotometer (Tecan F200). A partial DNA degradation was  
16 identified by electrophoresis (S2 Picture), but it was judged good resulting in no significant  
17 sequencing quality problems. The genomic DNA was sheared to approximately 566 bp and  
18 574 bp using a Covaris S2 Ultrasonicator, and then used in the preparation of whole-genome  
19 shotgun libraries according to Illumina's library preparation protocols. The efficacy of each  
20 step of the library construction was ascertained using a 2100 Bioanalyzer (S6 Figure). The  
21 final dilutions of the two libraries were then sequenced using a HiSeq2000 sequencer with the  
22 TruSeq PE Cluster kit v3-cbot HS and TruSeq SBS kit v3-HS for 200 cycles.

23



## 1 **Sequencing read filtering**

2 A DNA read was filtered out when the read' Q20 base content was lower than 70%, using  
3 IlluQCPRL.pl script of NGSQCToolkit (ver 2.3.3; S1 Table) [29]. We additionally  
4 downloaded genome data of the other bats (*Myotis brandtii*, *Myotis davidii*, *Myotis lucifugus*,  
5 *Pteropus Alecto*, and *Pteropus vampyrus*) from the NCBI database. Low quality DNA reads  
6 from the other bats were also filtered out using the same method (S1 Table). The possible  
7 microbial contaminated DNA reads were filtered out when the reads' alignment scores to  
8 microbial (bacteria and fungi) genomes were higher than that to the *Myotis* bat genomes (*M.*  
9 *brandtii*, *M. davidii*, and *M. lucifugus*; S3 Table). We used microbial genomes that were  
10 downloaded from Ensembl database and the three *Myotis* bat genome assemblies were from  
11 NCBI. The DNA reads were mapped to the microbial and *Myotis* bat genomes using BWA-  
12 MEM algorithm of BWA (version 0.7.15) with Mark shorter split hits as a secondary option (-  
13 M) [30]. The rmdup command of SAMtools (ver 0.1.19) was used to remove PCR duplicates  
14 [31]. The possible microbial contaminated reads in the other *Myotis* bats were also filtered  
15 out by using the same method but mapping was to their own genome assemblies (S1 Table).

16

## 17 **Species identification**

18 To construct the phylogenetic tree and identify the sample's species, the mitochondrial  
19 cytochrome b consensus sequence was generated by mapping the sequencing data to the *M.*  
20 *rufoniger* mitochondrial cytochrome b sequence (GenBank accession number: HQ184048.1)  
21 using BWA-MEM algorithm of BWA (version 0.7.15) with Mark shorter split hits as a  
22 secondary option (-M) [30]. The reads were realigned using the GATK (version 2.5-2)

1 RealignerTargetCreator and IndelRealigner algorithms to minimize the read alignment  
2 mismatches [32]. The rmdup command of SAMtools (ver 0.1.19) was used to remove PCR  
3 duplicates [31]. The variants from the whole genome sequencing data against the reference  
4 were called using mpileup command of SAMtools (version 0.1.19) with -E option to  
5 minimize the noise, -A option to use regardless of insert size constraint, -q 20 to consider  
6 only high quality mapping reads, and -Q 30 to consider only high quality bases [31]. The  
7 called variants were filtered using vcfutils.pl varFilter command of SAMtools (ver 0.1.19)  
8 with -d 8 option (minimal depth of 8) [31]. SNVs detected from the whole genome  
9 sequencing data against the reference were substituted to construct mitochondrial cytochrome  
10 b consensus sequence of the *M. rufoniger* using vcfutils.pl vcf2fq command of SAMtools  
11 (ver 0.1.19) with -l 5 option (no indel present within a 5 bp window) [31]. A multiple  
12 sequence alignment of the mitochondrial cytochrome b sequences was conducted using  
13 MUSCLE (version 3.8.31) program with default options [2,33]. A phylogenetic analysis was  
14 conducted using MEGA 7.0 program [34]. The phylogenetic tree was inferred by using a  
15 Maximum Likelihood method based on the Tamura-Nei model with 1,000 replicates  
16 bootstrapping [35,36]

17

## 18 **Genome size estimation**

19 For a  $K$ -mer analysis, KmerFreq\_HA command of SOAPec program in SOAPdenovo2  
20 package was used with a  $K=17$  option [37]. The genome size was estimated from the  
21 number of  $K$ -mers (depth  $> 3$ ) divided by the peak depth of the  $K$ -mer graph.

22

## 23 **Mapping sequence data**

1 The filtered sequenced reads were mapped to the three *Myotis* bat genome assemblies (*M.*  
2 *brandtii*, *M. davidii*, and *M. lucifugus*) using BWA-MEM algorithm of BWA (version 0.7.15)  
3 with Mark shorter split hits as a secondary option (-M) [30]. The reads were realigned using  
4 the GATK (version 2.5-2) RealignerTargetCreator and IndelRealigner algorithms to minimize  
5 the read alignment mismatches [32]. The rmdup command of SAMtools (ver 0.1.19) was  
6 used to remove PCR duplicates [31]. The variants of *M. rufoniger* were called using mpileup  
7 command of SAMtools with -E, -q 20, -A, and -Q 30 options [31]. The called variants were  
8 filtered using vcfutils.pl varFilter command of SAMtools (ver 0.1.19) with -d 8 and -D 250  
9 options (minimal depth of 8 and maximal depth of 250) [31]. The DNA consensus sequences  
10 of *M. rufoniger* were generated by substituting the *M. rufoniger* SNVs detected from the  
11 whole genome sequencing data to each reference bat genome using the vcfutils.pl vcf2fq  
12 command of SAMtools (ver 0.1.19) with -l 5 option [31].

13

## 14 **Repeat annotation**

15 RepeatMasker (version 4.0.5) was used to identify transposable elements by aligning the *M.*  
16 *rufoniger* consensus genome sequence against a library of *M. brandtii* with default option  
17 [38]. For the comparison of the *M. rufoniger*'s repeat annotation with the other species, the  
18 same method was used for other genome references.

19

## 20 **Sex determination**

21 Male *M. davidii* reads were mapped to the *M. brandtii* (a male sample) genome assembly  
22 using BWA-MEM algorithm of BWA 0.7.15 version [30] with -M option. The reads were

1 realigned using the GATK (version 2.5-2) RealignerTargetCreator and IndelRealigner  
2 algorithms to minimize the read mismatches [32]. The rmdup command of SAMtools (ver  
3 0.1.19) was used to remove PCR duplicates [31]. Variants were called using mpileup  
4 command of SAMtools with -E, -q 20, -A, and -Q 30 options [31]. The called variants were  
5 filtered using vcfutils.pl varFilter command of SAMtools (ver 0.1.19) with -d 8 and -D 250  
6 options [31]. To identify X-chromosomal scaffolds from the *M. brandtii* genome assembly,  
7 we conducted BLASTn (Blast 2.2.26) with an E-value cutoff of 1E-6 using X-chromosomal  
8 CDS sequences of human as queries [39]. Scaffolds having greater than or equal to 10 top  
9 hits were considered as X-chromosomal scaffolds.

10

## 11 **Comparative evolutionary analysis**

12 Orthologous gene families between *M. rufoniger*'s sequence and 13 mammalian genomes  
13 (Seven bat genomes: *M. brandtii*, *M. lucifugus*, *M. davidii*, *E. fuscus*, *P. alecto*, *P.*  
14 *vampyrus*, and *R. aegyptiacus*, and six other mammals: *H. sapiens*, *M. musculus*, *B. taurus*, *E.*  
15 *caballus*, *H. glaber*, and *M. domestica*; S2 Table) were identified using OrthoMCL software  
16 (version 2.0.9) by matching and adding the *M. rufoniger* genes to orthologous clusters of *M.*  
17 *brandtii*'s genes, and 6,782 single-copy gene families among the 14 species were collected  
18 [7,13]. *M. brandtii*, *M. lucifugus*, *M. davidii*, *E. fuscus*, *P. alecto*, *P. vampyrus*, *R. aegyptiacus*,  
19 *H. sapiens*, *M. musculus*, *B. taurus*, *E. caballus*, *H. glaber*, and *M. domestica* genomes and  
20 gene sets were downloaded from the NCBI database (S3 Table).

21 To construct a phylogenetic tree and estimate the divergence time of bats and other mammals,  
22 1,258,141 four-fold degenerate sites from the 6,782 single-copy gene families were used to

1 conduct the multiple sequence alignment (MSA) using MUSCLE (version 3.8.31) program  
2 [33]. The phylogenetic tree was constructed among the 14 species using a Randomized  
3 Axelerated Maximum Likelihood (RAxML) program (version 8.2) [40]. In RAxML program,  
4 GTR gamma model was used as the nucleotide substitution model. In order to check the  
5 branch reliability, 1,000 rapid bootstrapping was used. The *M. domestica* was used as an  
6 outgroup species. Based on this phylogenetic tree topology, the divergence time was  
7 estimated using Reltime-ML in MEGA 7.0 program [34]. In this process, the divergence time  
8 at the node between *M. brandtii* – *H. sapiens* was constrained to be 97.5 MYA, and *M.*  
9 *brandtii* – *P. alecto* was constrained to be 62.6 MYA based on the TimeTree database [41].

10 Amino acid changes were identified by constructing MSAs among the 6,782 single copy gene  
11 families using Clustal Omega (version 1.2.4) [42]. Function-altering amino acid changes  
12 were predicted using PROVEAN (version 1.1.5) [14]. The MSAs of the *DCT*, *SLC45A2*,  
13 *TYRP1*, *OCA2*, and *N6AMT1* genes were manually checked, and uAACs within misaligned  
14 regions were excluded in the variant score analysis. Only homozygous amino acid variants  
15 were considered in the amino acid sequence comparison analysis to reduce bias from  
16 individual-specific variants.

17

## 18 **Demographic history and genetic diversity**

19 The demographic history of the *Myotis* bats was estimated using a pairwise sequential  
20 Markovian coalescent (PSMC) program [11]. We mapped the downloaded genome  
21 sequencing data of *Myotis* bats to the *M. lucifugus* genome assembly using BWA-MEM  
22 algorithm of BWA 0.7.15 version [30] with –M option. The reads were realigned using the

1 GATK (version 2.5-2) RealignerTargetCreator and IndelRealigner algorithms to minimize the  
2 read mismatches [32]. The rmdup command of SAMtools (ver 0.1.19) was used to remove  
3 PCR duplicates [31]. SAMtools was used to extract diploid genome information from the  
4 BAM files [31]. Options of -N25 -t15 -r -p “4+25\*2+4+6” were used for the PSMC analysis.  
5 The generation time for the *Myotis* bats was estimated as sum of average maturation and  
6 gestation time (S16 Table) [43,44]. The mutation rate of *Myotis* bats was estimated by  
7 multiplying reported neutral mutation rate for mammals ( $2.2 \times 10^{-9}$  per base pair per year) by  
8 the generation time (1.2 year) [45]. Atmospheric surface air temperature and global relative  
9 sea level data of the past three million years were obtained and used for this analysis [46].  
10 The genomic diversity was calculated by dividing the number of heterozygous SNVs by its  
11 genome size (bp) [8]. For the genomic diversity calculation, variants were called using  
12 mpileup command of SAMtools with -E, -q 20, -A, and -Q 30 options [31]. The called  
13 variants were filtered using vcfutils.pl varFilter command of SAMtools (ver 0.1.19) with -d 8  
14 and -D 250 options [31].

## 1 **Acknowledgements**

2 Korea Institute of Science and Technology Information (KISTI) provided us with Korea  
3 Research Environment Open NETwork (KREONET) which is an academic internet  
4 connection service.

5

## 6 **References**

- 7 1. Tomes RF, editor ON THE CHARACTERS OF FOUR SPECIES OF BATS  
8 INHABITING EUROPE AND ASIA, AND THE DESCRIPTION OF A NEW  
9 SPECIES OF VESPERTILIO INHABITING MADAGASCAR. Proceedings of the  
10 Zoological Society of London; 1858: Wiley Online Library.
- 11 2. Ruedi M, Csorba G, Lin L-K, Chou C-H. Molecular phylogeny and morphological  
12 revision of Myotis bats (Chiroptera: Vespertilionidae) from Taiwan and adjacent  
13 China. Zootaxa. 2015;3920(1):301-42.
- 14 3. Zhang G, Cowled C, Shi Z, Huang Z, Bishop-Lilly KA, Fang X, et al. Comparative  
15 analysis of bat genomes provides insight into the evolution of flight and immunity.  
16 Science. 2012:1230835.
- 17 4. Seim I, Fang X, Xiong Z, Lobanov AV, Huang Z, Ma S, et al. Genome analysis  
18 reveals insights into physiology and longevity of the Brandt's bat Myotis brandtii.  
19 Nature communications. 2013;4.
- 20 5. Cho YS, Hu L, Hou H, Lee H, Xu J, Kwon S, et al. The tiger genome and  
21 comparative analysis with lion and snow leopard genomes. Nature communications.

- 1           2013;4.
- 2           6. Yim H-S, Cho YS, Guang X, Kang SG, Jeong J-Y, Cha S-S, et al. Minke whale  
3           genome and aquatic adaptation in cetaceans. *Nature genetics*. 2014;46(1):88-92.
- 4           7. Chung O, Jin S, Cho YS, Lim J, Kim H, Jho S, et al. The first whole genome and  
5           transcriptome of the cinereous vulture reveals adaptation in the gastric and immune  
6           defense systems and possible convergent evolution between the Old and New World  
7           vultures. *Genome biology*. 2015;16(1):1.
- 8           8. Kim S, Cho YS, Kim H-M, Chung O, Kim H, Jho S, et al. Comparison of carnivore,  
9           omnivore, and herbivore mammalian genomes with a new leopard assembly. *Genome  
10          Biology*. 2016;17(1):211.
- 11          9. Kim YM, Choi EH, Kim SK, Jang KH, Ryu SH, Hwang UW. Complete  
12          mitochondrial genome of the Hodgson's bat *Myotis formosus* (Mammalia, Chiroptera,  
13          Vespertilionidae). *Mitochondrial DNA*. 2011;22(4):71-3.
- 14          10. Miller W, Schuster SC, Welch AJ, Ratan A, Bedoya-Reina OC, Zhao F, et al. Polar  
15          and brown bear genomes reveal ancient admixture and demographic footprints of past  
16          climate change. *Proceedings of the National Academy of Sciences*.  
17          2012;109(36):E2382-E90.
- 18          11. Li H, Durbin R. Inference of human population history from individual whole-  
19          genome sequences. *Nature*. 2011;475(7357):493-6.
- 20          12. Smith JD, Gregory TR. The genome sizes of megabats (Chiroptera: Pteropodidae) are  
21          remarkably constrained. *Biology letters*. 2009;5(3):347-51.



- 1 13. Li L, Stoeckert CJ, Roos DS. OrthoMCL: identification of ortholog groups for  
2 eukaryotic genomes. *Genome research*. 2003;13(9):2178-89.
- 3 14. Choi Y, Sims GE, Murphy S, Miller JR, Chan AP. Predicting the functional effect of  
4 amino acid substitutions and indels. *PloS one*. 2012;7(10):e46688.
- 5 15. Huang DW, Sherman BT, Lempicki RA. Systematic and integrative analysis of large  
6 gene lists using DAVID bioinformatics resources. *Nature protocols*. 2009;4(1):44-57.
- 7 16. Racey P. The prolonged storage and survival of spermatozoa in Chiroptera. *Journal of*  
8 *Reproduction and Fertility*. 1979;56(1):391-402.
- 9 17. Hartman CG. On the survival of spermatozoa in the female genital tract of the bat.  
10 *The Quarterly Review of Biology*. 1933;8(2):185-93.
- 11 18. Kitchener D. Reproduction in female Gould's wattled bat, *Chalinolobus gouldii*  
12 (Gray)(Vespertilionidae), in Western Australia. *Australian journal of zoology*.  
13 1975;23(1):29-42.
- 14 19. Sturm RA, Duffy DL. Human pigmentation genes under environmental selection.  
15 *Genome biology*. 2012;13(9):248.
- 16 20. Newton J, Cohen-Barak O, Hagiwara N, Gardner JM, Davisson MT, King RA, et al.  
17 Mutations in the human orthologue of the mouse underwhite gene (*uw*) underlie a  
18 new form of oculocutaneous albinism, *OCA4*. *The American Journal of Human*  
19 *Genetics*. 2001;69(5):981-8.
- 20 21. Boissy RE, Zhao H, Oetting WS, Austin LM, Wildenberg SC, Boissy YL, et al.  
21 Mutation in and lack of expression of tyrosinase-related protein-1 (*TRP-1*) in

- 1 melanocytes from an individual with brown oculocutaneous albinism: a new subtype  
2 of albinism classified as "OCA3". American journal of human genetics.  
3 1996;58(6):1145.
- 4 22. Manga P, Kromberg J, Box N, Sturm R, Jenkins T, Ramsay M. Rufous  
5 oculocutaneous albinism in southern African Blacks is caused by mutations in the  
6 *TYRP1* gene. The American Journal of Human Genetics. 1997;61(5):1095-101.
- 7 23. Lee S-T, Nicholls RD, Jong MT, Fukai K, Spritz RA. Organization and sequence of  
8 the human P gene and identification of a new family of transport proteins. Genomics.  
9 1995;26(2):354-63.
- 10 24. Han J, Kraft P, Nan H, Guo Q, Chen C, Qureshi A, et al. A genome-wide association  
11 study identifies novel alleles associated with hair color and skin pigmentation. PLoS  
12 Genet. 2008;4(5):e1000074.
- 13 25. Xu X, Dong G-X, Hu X-S, Miao L, Zhang X-L, Zhang D-L, et al. The genetic basis  
14 of white tigers. Current biology. 2013;23(11):1031-5.
- 15 26. Ren X, Aleshin M, Jo WJ, Dills R, Kalman DA, Vulpe CD, et al. Involvement of N-6  
16 adenine-specific DNA methyltransferase 1 (N6AMT1) in arsenic biomethylation and  
17 its role in arsenic-induced toxicity. Environmental health perspectives.  
18 2011;119(6):771.
- 19 27. Yu HJ, Kang JH, Lee S, Choi YJ, Oh D, Lim JD, et al. Elemental analysis of the liver,  
20 kidney, and intestine tissues from a Hodgson's bat (*Myotis formosus tsuensis*).  
21 Korean Journal of Veterinary Research. 2016;56(1):51-2.

- 1        28. Monge G, Jimenez-Espejo FJ, García-Alix A, Martínez-Ruiz F, Mattielli N,  
2        Finlayson C, et al. Earliest evidence of pollution by heavy metals in archaeological  
3        sites. *Scientific reports*. 2014;5:14252-.
- 4        29. Patel RK, Jain M. NGS QC Toolkit: a toolkit for quality control of next generation  
5        sequencing data. *PloS one*. 2012;7(2):e30619.
- 6        30. Li H, Durbin R. Fast and accurate short read alignment with Burrows–Wheeler  
7        transform. *Bioinformatics*. 2009;25(14):1754-60.
- 8        31. Li H, Handsaker B, Wysoker A, Fennell T, Ruan J, Homer N, et al. The sequence  
9        alignment/map format and SAMtools. *Bioinformatics*. 2009;25(16):2078-9.
- 10       32. McKenna A, Hanna M, Banks E, Sivachenko A, Cibulskis K, Kernytsky A, et al. The  
11       Genome Analysis Toolkit: a MapReduce framework for analyzing next-generation  
12       DNA sequencing data. *Genome research*. 2010;20(9):1297-303.
- 13       33. Edgar RC. MUSCLE: multiple sequence alignment with high accuracy and high  
14       throughput. *Nucleic acids research*. 2004;32(5):1792-7.
- 15       34. Kumar S, Stecher G, Tamura K. MEGA7: Molecular Evolutionary Genetics Analysis  
16       version 7.0 for bigger datasets. *Molecular biology and evolution*. 2016:mw054.
- 17       35. Tamura K, Nei M. Estimation of the number of nucleotide substitutions in the control  
18       region of mitochondrial DNA in humans and chimpanzees. *Molecular biology and  
19       evolution*. 1993;10(3):512-26.
- 20       36. Felsenstein J. Confidence limits on phylogenies: an approach using the bootstrap.  
21       *Evolution*. 1985:783-91.

- 1        37. Luo R, Liu B, Xie Y, Li Z, Huang W, Yuan J, et al. SOAPdenovo2: an empirically  
2        improved memory-efficient short-read de novo assembler. *GigaScience*. 2012;1(1):1.
- 3        38. Tarailo-Graovac M, Chen N. Using RepeatMasker to identify repetitive elements in  
4        genomic sequences. *Current Protocols in Bioinformatics*. 2009;4.10. 1-4.. 4.
- 5        39. Altschul SF, Gish W, Miller W, Myers EW, Lipman DJ. Basic local alignment search  
6        tool. *Journal of molecular biology*. 1990;215(3):403-10. Stamatakis A. RAxML  
7        version 8: a tool for phylogenetic analysis and post-analysis of large phylogenies.  
8        *Bioinformatics*. 2014;30(9):1312-3.
- 9        40. Hedges SB, Dudley J, Kumar S. TimeTree: a public knowledge-base of divergence  
10        times among organisms. *Bioinformatics*. 2006;22(23):2971-2.
- 11       41. Sievers F, Wilm A, Dineen D, Gibson TJ, Karplus K, Li W, et al. Fast, scalable  
12       generation of high-quality protein multiple sequence alignments using Clustal  
13       Omega. *Molecular systems biology*. 2011;7(1):539.
- 14       42. Tacutu R, Craig T, Budovsky A, Wuttke D, Lehmann G, Taranukha D, et al. Human  
15       ageing genomic resources: integrated databases and tools for the biology and genetics  
16       of ageing. *Nucleic acids research*. 2012:gks1155.
- 17       43. Iannelli M. *Mathematics of Biology: Lectures given at a Summer School of the*  
18       *Centro Internazionale Matematico Estivo (CIME) held in Cortona (Arezzo), Italy,*  
19       *June 18-30, 1979: Springer Science & Business Media; 2011.*
- 20       44. Kumar S, Subramanian S. Mutation rates in mammalian genomes. *Proceedings of the*  
21       *National Academy of Sciences*. 2002;99(2):803-8.

1        45. Bintanja R, Van de Wal R. North American ice-sheet dynamics and the onset of  
2        100,000-year glacial cycles. *Nature*. 2008;454(7206):869-72.

3

## 4        **Supporting information**

5        **S1 Picture. *M. rufoniger* carcass picture.**

6        **S2 Picture. DNA sample electrophoresis.**

7        **S1 Figure. Phylogenetic relationship of the *M. rufoniger* sample with other bats.**

8        The phylogenetic relationship of *Myotis* bats was inferred from the alignment of  
9        mitochondrial cytochrome b coding sequences. The percentage of trees in which the  
10       associated taxa clustered together is shown next to the branches. Each node has its species  
11       name and GenBank accession number.

12       **S2 Figure. Estimation of genome size using a *K*-mer (17-mers) analysis.**

13       The x-axis represents depth, and the y-axis represents proportion, as calculated by the  
14       frequency at a given depth divided by the total frequency at all depths.

15       **S3 Figure. Previously reported bats' unique amino acid changes.**

16       Previously reported bats' unique amino acid sequence changes within *FSHB*, *GHR*, *IGF1R*,  
17       *TP53*, and *MDM2* are highlighted in yellow; (A), Alignment of *FSHB* encoded peptide  
18       sequences; (B), Alignment of *GHR*-encoded peptide sequences; (C), Alignment of *IGF1R*  
19       encoded peptide sequences; (D), Alignment of *TP53*-encoded peptide sequences; (E),  
20       Alignment of *MDM2* encoded peptide sequences; (F), Alignment of *SLC45A2*-encoded

1 peptide sequences; (G), Alignment of *RGS7BP*-encoded peptide sequences; (H), Alignment  
2 of *RHO*-encoded peptide sequences; (I), Alignment of *OPN1SW*-encoded peptide sequences;  
3 (J), Alignment of *CNGB3*-encoded peptide sequences.

4 **S4 Figure. *Myotis* bats' uAACs within *DCT*, *SLC45A2*, *TYRP1*, and *OCA2* genes.**

5 *Myotis* bats' uAACs within *DCT*, *SLC45A2*, *TYRP1*, and *OCA2* genes are highlighted  
6 (yellow if PROVEAN score of variant  $\leq -2.5$ , unless green). The domain region of human  
7 sequences are shaded in gray; (A) Alignment of *DCT* encoded peptide sequences; (B)  
8 Alignment of *SLC45A2* encoded peptide sequences; (C) Alignment of *TYRP1* encoded  
9 peptide sequences; (D) Alignment of *OCA2* encoded peptide sequences.

10 **S5 Figure. *M. rufoniger* specific amino acid sequence changes**

11 *M. rufoniger* specific amino acid sequence changes within *N6AMT1* gene are highlighted in  
12 yellow.

13 **S6 Figure. Sequencing library 574bp QC.**

14 (A) Sequencing library 574bp QC; (B) Sequencing library 566bp QC.

15 **S1 Table. Sequencing read filtering result.**

16 **S2 Table. 17-mer statistics information.**

17 **S3 Table. Reference genomes used in this study.**

18 **S4 Table. Base composition of *M. rufoniger* genome.**

19 The GC contents were calculated by dividing the number of  $[(C+G+S) - (M+K+R+Y)] \sim$   
20  $[(C+G+S) + (M+K+R+Y)]$  by the number of (sum - gap); The proportion of A, C, G, and T,  
21 and the proportion of W, S, M, K, and Y were calculated by dividing each number by the  
22 number of (sum-gap)

- 1 **S5 Table. GC content statistics of *M. rufoniger*.**
- 2 **S6 Table. Transposon-derived repeats in the *M. rufoniger* genome.**
- 3 **S7 Table. Comparison of X-chromosomal scaffold heterozygosity.**
- 4 **S8 Table. *M. rufoniger* unique amino acid changes.**
- 5 **S9 Table. *M. rufoniger* unique amino acid changes from gap filtered sequences.**
- 6 **S10 Table. Functional enrichment of *M. rufoniger* uAACs containing genes.**
- 7 **S11 Table. PROVEAN scores of *DCT*, *SLC45A2*, *TYRP1*, and *OCA2* genes.**
- 8 **S12 Table. Sum of the PROVEAN scores**
- 9 **S13 Table. PROVEAN scores of top 20 ranked genes.**
- 10 **S14 Table. Sum of the PROVEAN scores of top 20 ranked genes.**
- 11 **S15 Table. Variants statistics regarding mapping of *Myotis* bat raw reads to the *M.***
- 12 ***lucifugus* reference**
- 13 **S16 Table. Generation time calculation.**

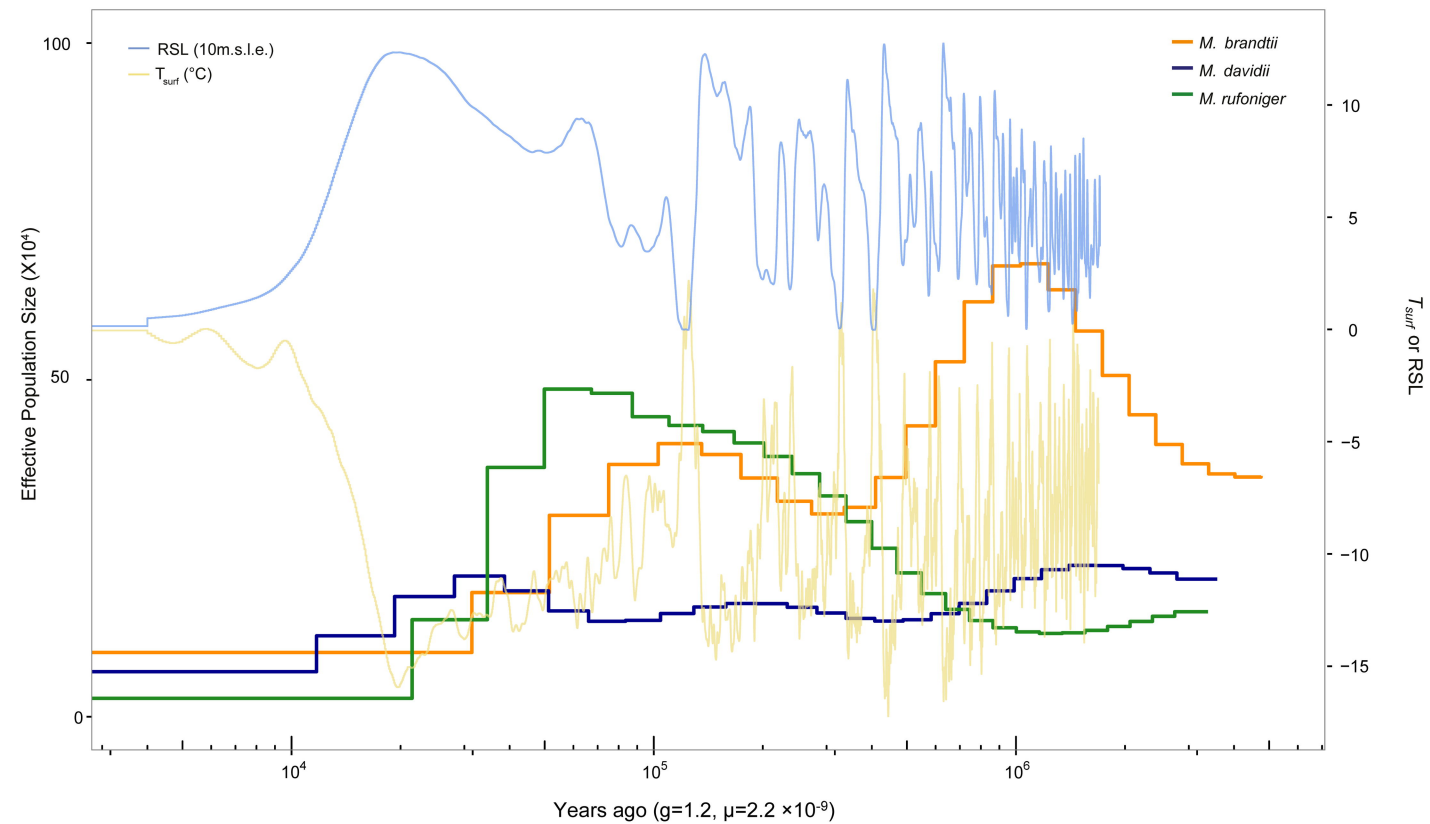



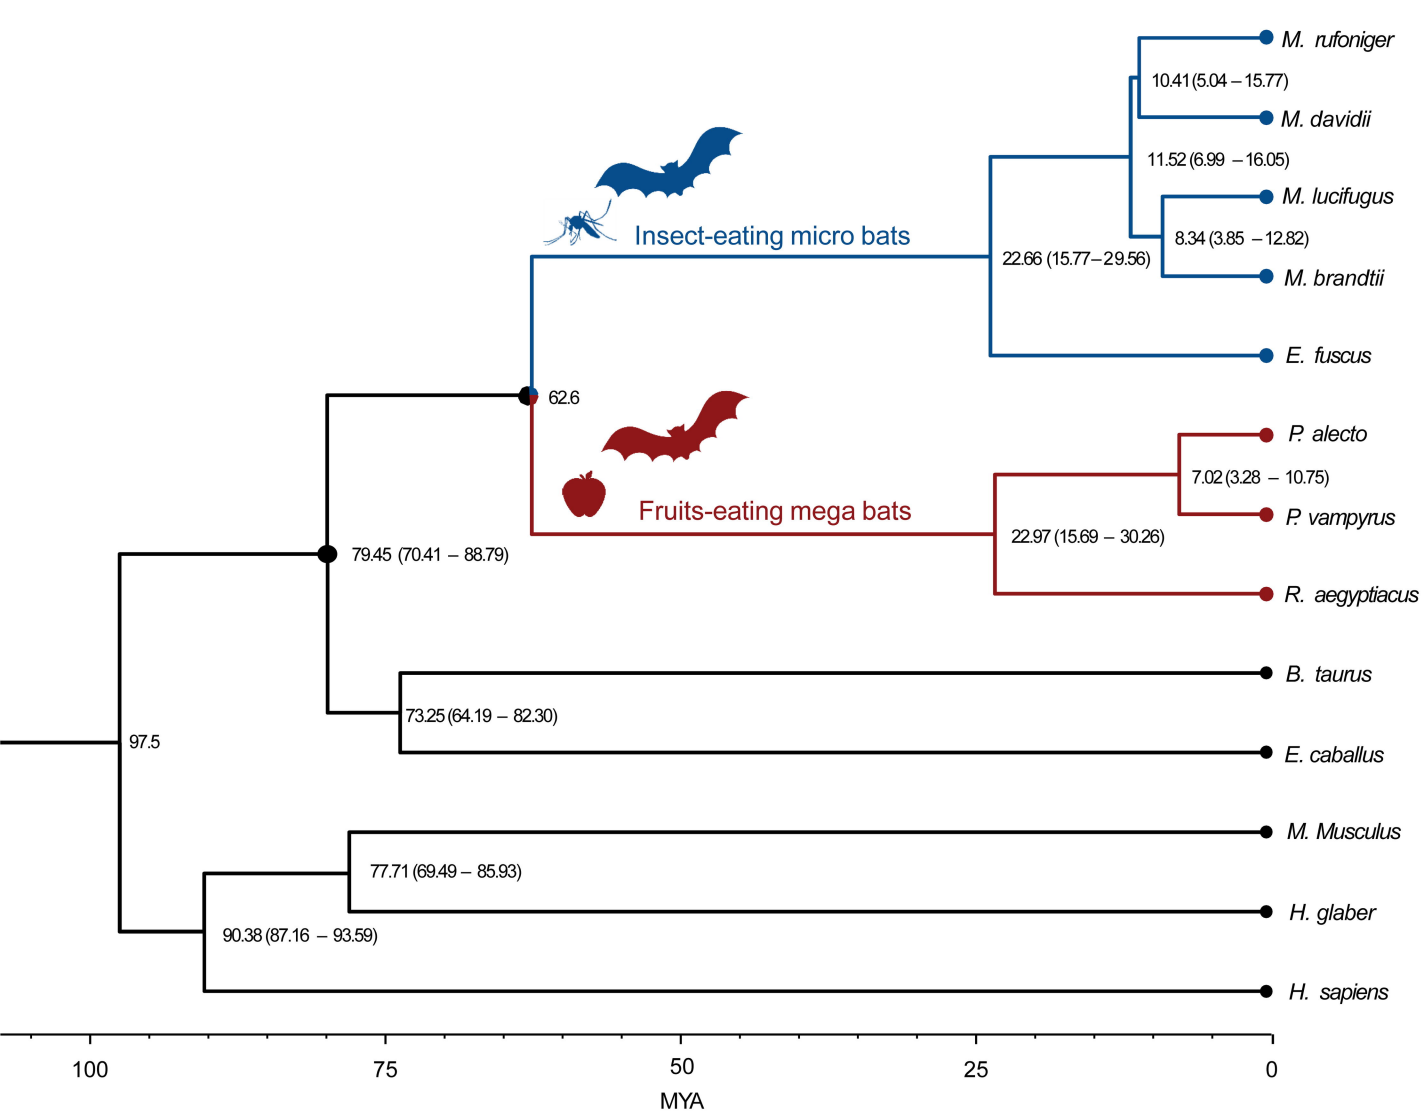

Source: https://www.biorxiv.org/content/10.1101/131904v1.full.pdf
